# Supplementary material for: Sustained Activation of the Anterior Thalamic Neurons with Low Doses of Kainic Acid Boosts Hippocampal Neurogenesis
Source: MDPI journal article supplement (doi:10.3390/cells11213413), 2022-10-28
Supplement: s1 [file s1]

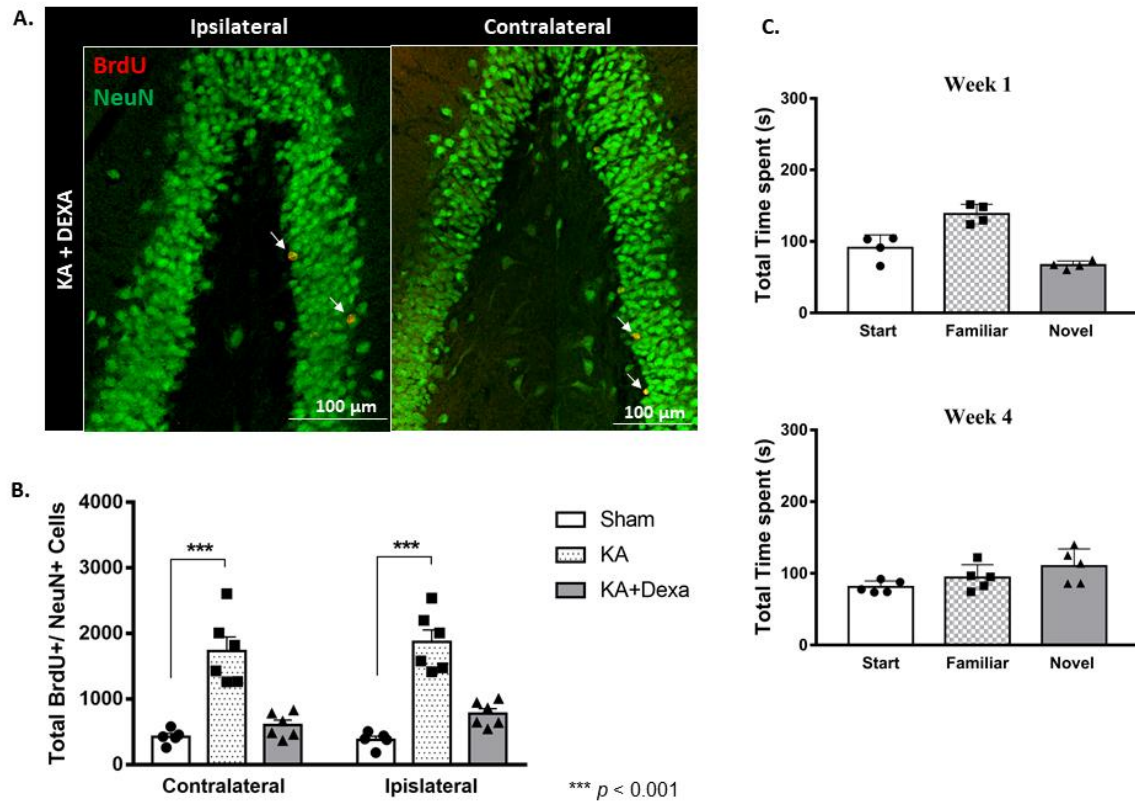

**Figure S1.** Daily treatment with dexamethasone prior to/and simultaneous with KA maintained neurogenesis and exploration at near-sham levels. **(A)** Confocal images showing immunofluorescence labeling of NeuN and BrdU (arrows) in the DG of KA + Dexa group at 4 weeks. Images were taken as Z stacks using 40X-oil objective. **(B)** Stereological quantification of BrdU-labeled cells in the DG of sham ( $n = 5$ ), KA ( $n = 6$ ) and KA + Dexa ( $n = 6$ ) injected groups at 4 weeks. Determination of statistical significance of differences was made using two-way ANOVA followed by Sidak's multiple comparison test. **(C)** Graph representing the mean  $\pm$  SEM of the total time spent in the novel, familiar (second arm) and start arms at week 1 and after 4 weeks following KA + Dexa. Repeated measures one-way ANOVA followed by Tukey's multiple comparison was performed to determine statistically significant differences in the total time spent between the different arms.
